# Supplementary material for: DJ-1 contributes to adipogenesis and obesity-induced inflammation
Source: PubMed Central journal article supplement — Sci Rep. 2014 Jun 13;4:4805. doi: 10.1038/srep04805 (PMC4055892; doi:10.1038/srep04805), 2014-06-13
Supplement: srep04805-s1.pdf [file srep04805-s1.pdf]

## Supplementary Information

# DJ-1 contributes to adipogenesis and obesity-induced inflammation

Jung-Min Kim<sup>1,\*</sup>, Hyun-Jun Jang<sup>1,2</sup>, Soo Youn Choi<sup>1</sup>, Soo-Ah Park<sup>1</sup>, Il Shin Kim<sup>1</sup>, Yong Ryoul Yang<sup>1</sup>,  
Yong Hwa Lee<sup>1</sup>, Sung Ho Ryu<sup>2</sup> and Pann-Ghill Suh<sup>1</sup>

<sup>1</sup>School of Nano-Bioscience & Chemical Engineering, Ulsan National Institute of Science and Technology, Ulsan, Republic of Korea

<sup>2</sup>Division of Molecular and Life Sciences, Pohang University of Science and Technology, Pohang, Republic of Korea

\* Present address: Department of Pathology and Laboratory Medicine, Weill Cornell Medical College, New York, NY, USA

## Inventory of Supplementary Information

### 1. Supplementary Figures and Legends

Figure S1, related to Figure 2

Figure S2, related to Figure 3

Figure S3, related to Figure 3

Figure S4, related to Figure 3

Figure S5, related to Figure 4

Figure S6, related to Figure 4

Figure S7, related to Figure 4

### 2. Supplementary Table

### 3. Supplementary Methods

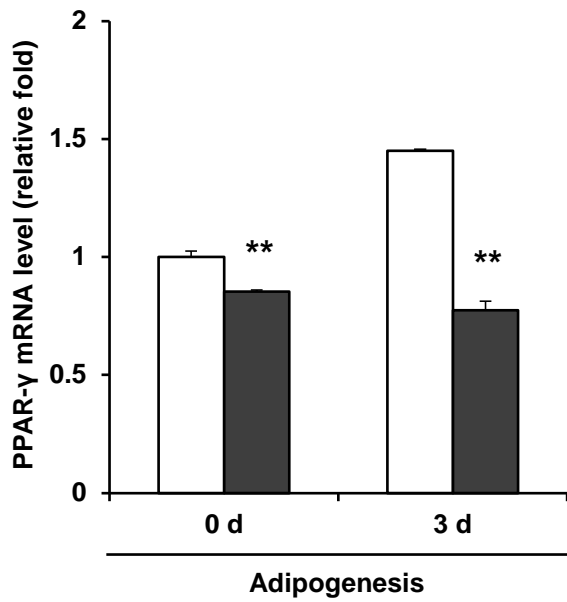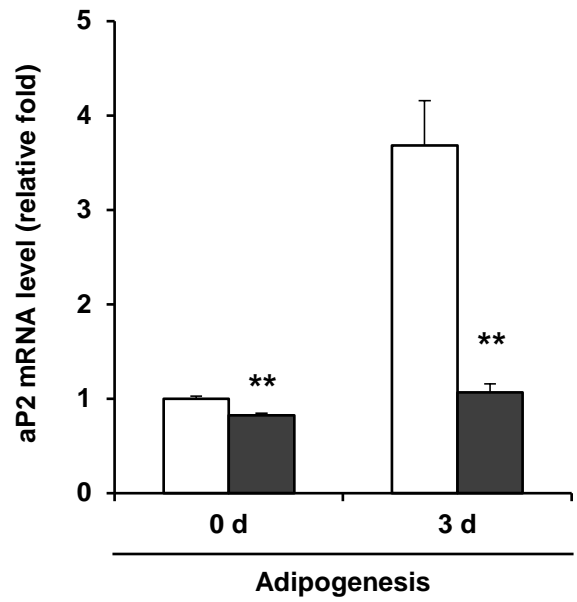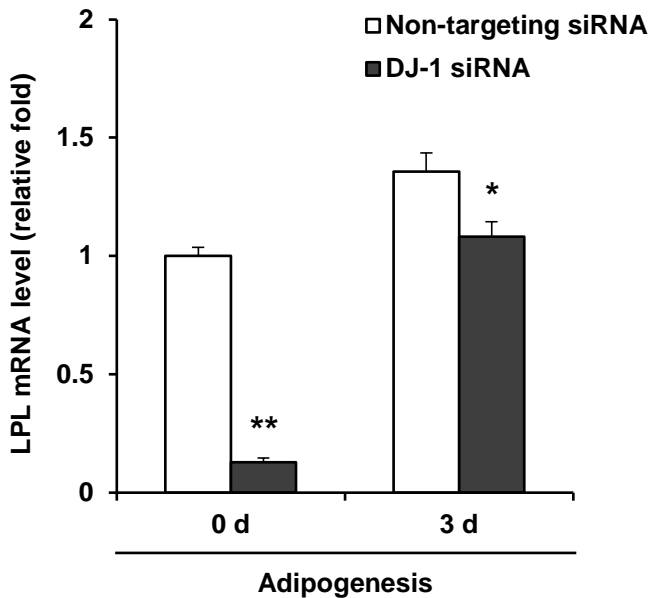

|                |               | 0 d             | 3 d             |
|----------------|---------------|-----------------|-----------------|
| PPAR- $\gamma$ | Non-targeting | 1.00 $\pm$ 0.02 | 1.45 $\pm$ 0.01 |
|                | DJ-1          | 0.85 $\pm$ 0.01 | 0.77 $\pm$ 0.04 |
| aP2            | Non-targeting | 1.00 $\pm$ 0.02 | 3.68 $\pm$ 0.47 |
|                | DJ-1          | 0.82 $\pm$ 0.02 | 1.07 $\pm$ 0.09 |
| LPL            | Non-targeting | 1.00 $\pm$ 0.04 | 1.36 $\pm$ 0.08 |
|                | DJ-1          | 0.13 $\pm$ 0.02 | 1.08 $\pm$ 0.06 |

**Supplementary Figure S1 (related to Figure 2). Knock-down of DJ-1 results in reduced expression of adipogenic marker genes.**

The gene expression levels of PPAR- $\gamma$ , aP2 and LPL were determined by quantitative RT-PCR. 3T3-L1 cells were transfected with non-targeting or anti-DJ-1 siRNA (10 nM). After 48 h, the cells were confluent and grown under adipogenesis induction conditions. \*,  $p < 0.05$  and \*\*,  $p < 0.01$  versus the control. All data are presented as the mean  $\pm$  s.d.

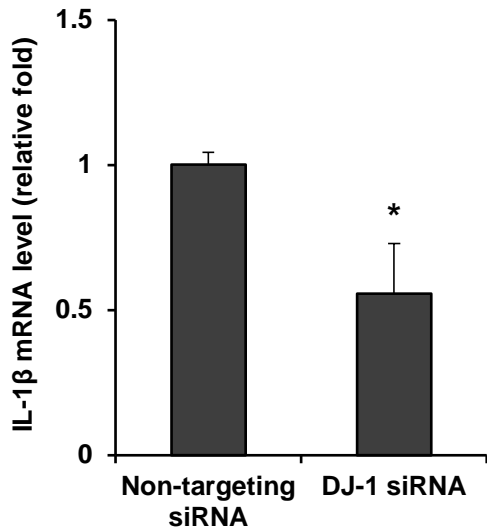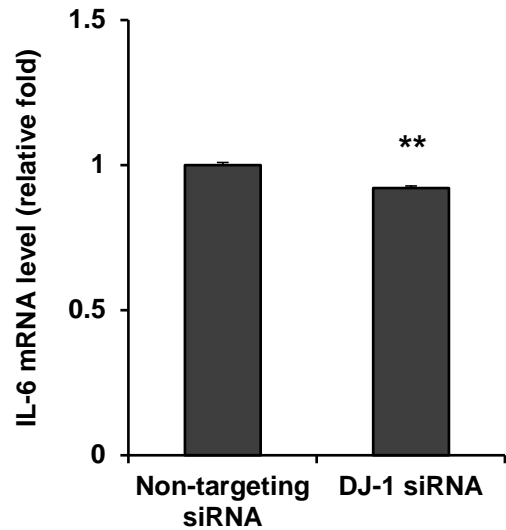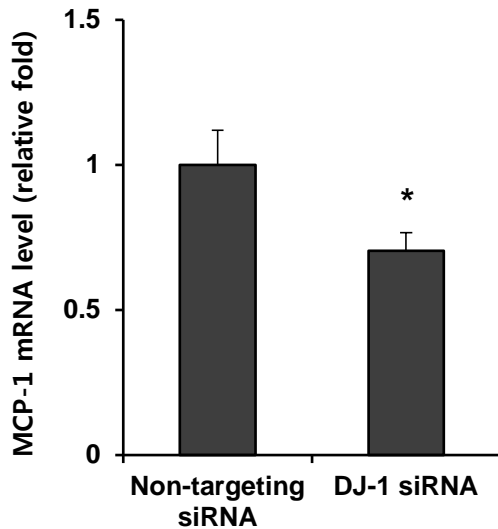

|       |               | 0 d         |
|-------|---------------|-------------|
| IL-1β | Non-targeting | 1.00 ± 0.04 |
|       | DJ-1          | 0.56 ± 0.17 |
| IL-6  | Non-targeting | 1.00 ± 0.01 |
|       | DJ-1          | 0.92 ± 0.01 |
| MCP-1 | Non-targeting | 1.00 ± 0.12 |
|       | DJ-1          | 0.13 ± 0.06 |

**Supplementary Figure S2 (related to Figure 3). DJ-1 regulates the expression of pro-inflammatory cytokines in 3T3-L1 cells.**

The expression levels of IL-1β, IL-6 and MCP-1 were determined by quantitative RT-PCR. 3T3-L1 cells were transfected with non-targeting or anti-DJ-1 siRNA (10 nM). After 48 h, the cells were reached confluence, and the mRNA level was analyzed. \*,  $p < 0.05$  and \*\*,  $p < 0.01$  versus the control.

All data are presented as the mean ± s.d.

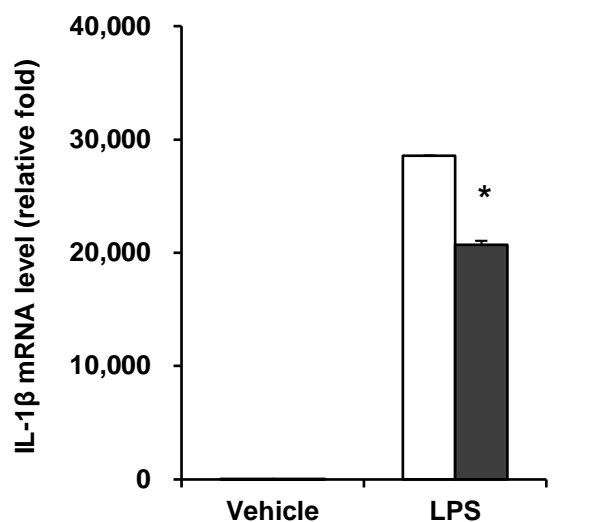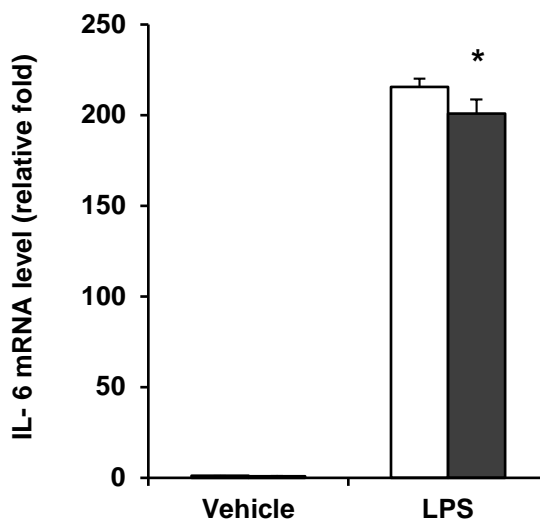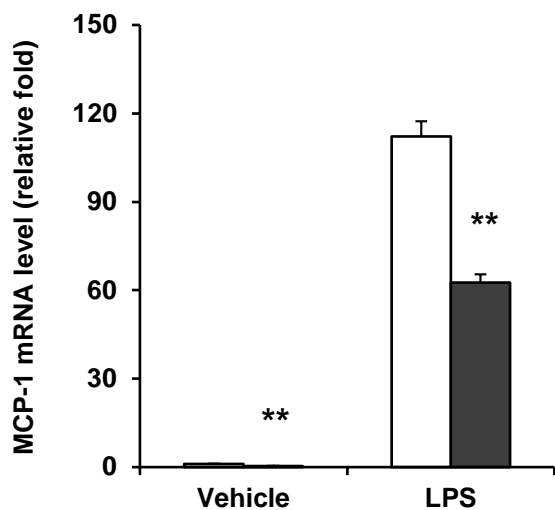

|       |               | Vehicle     | LPS                |
|-------|---------------|-------------|--------------------|
| IL-1β | Non-targeting | 1.00 ± 0.11 | 28578.30 ± 3602.76 |
|       | DJ-1          | 0.82 ± 0.11 | 20720.68 ± 362.05  |
| IL-6  | Non-targeting | 1.00 ± 0.06 | 215.53 ± 4.55      |
|       | DJ-1          | 0.94 ± 0.07 | 200.56 ± 7.81      |
| MCP-1 | Non-targeting | 1.00 ± 0.06 | 112.17 ± 5.12      |
|       | DJ-1          | 0.36 ± 0.02 | 62.52 ± 2.86       |

**Supplementary Figure S3 (related to Figure 3). DJ-1 knock-down reduces the expression of pro-inflammatory cytokine genes in macrophage cells.**

The gene expression levels of IL-1β, IL-6 and MCP-1 were determined in non-targeting or anti-DJ-1 siRNA-treated RAW264.7 cells. The cells were transfected with non-targeting or anti-DJ-1 siRNA (10 nM) for 48 h. Subsequently, the cells were treated with LPS (100 ng/ml) for 8 h. The mRNA levels were determined by RT-PCR. \*,  $p < 0.05$  and \*\*,  $p < 0.01$  versus the control. All data are presented as the mean ± s.d.

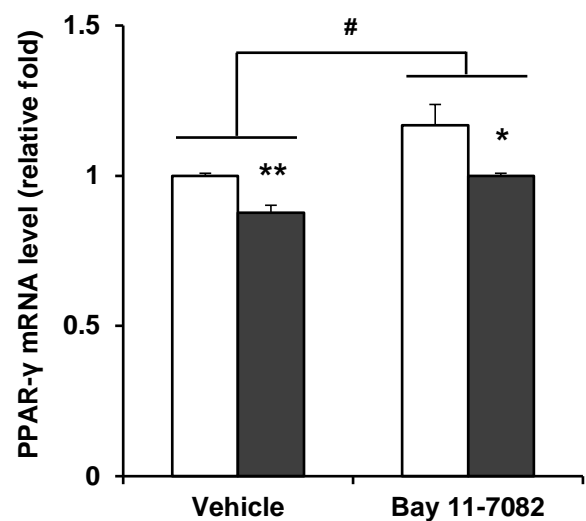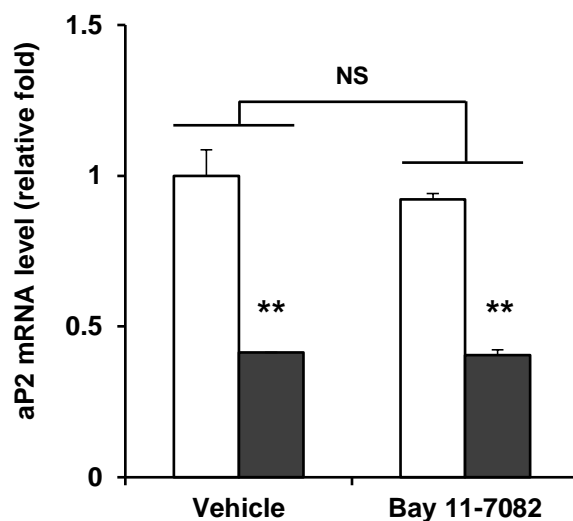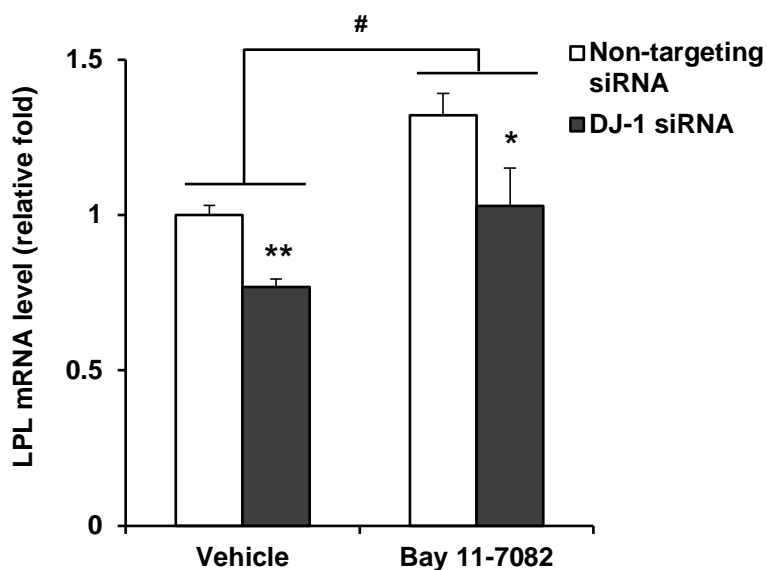

|        |               | Vehicle     | Bay 11-7082 |
|--------|---------------|-------------|-------------|
| PPAR-γ | Non-targeting | 1.00 ± 0.01 | 1.17 ± 0.07 |
|        | DJ-1          | 0.88 ± 0.02 | 1.00 ± 0.01 |
| aP2    | Non-targeting | 1.00 ± 0.09 | 0.92 ± 0.02 |
|        | DJ-1          | 0.41 ± 0.00 | 0.40 ± 0.02 |
| LPL    | Non-targeting | 1.00 ± 0.03 | 1.32 ± 0.07 |
|        | DJ-1          | 0.77 ± 0.02 | 1.03 ± 0.12 |

**Supplementary Figure S4 (related to Figure 3). The effect of NF-κB inhibitor on the expression of adipogenic markers.**

3T3-L1 cells were transfected with non-targeting or anti-DJ-1 siRNA and treated with an inhibitor of NF-κB (Bay 11-7082, 1 μM) for 6 d under adipogenic differentiation conditions. The mRNA levels were examined by RT-PCR. \*,  $p < 0.05$  and \*\*,  $p < 0.01$  versus the control. #,  $p < 0.05$  versus the vehicle treatment. NS, not significant. All data are presented as the mean ± s.d.

**(a)**

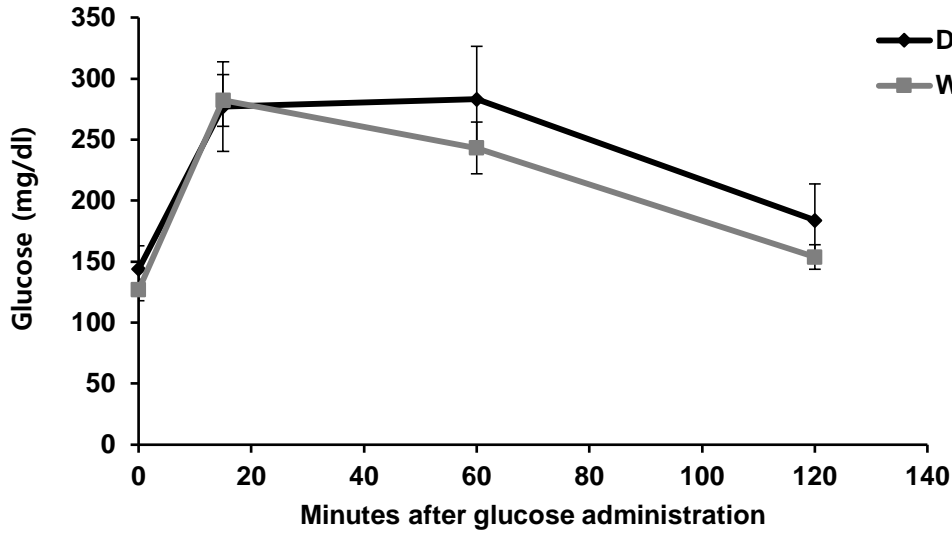

| min | WT             | DJ-1 KO        |
|-----|----------------|----------------|
| 0   | 126.89 ± 8.76  | 143.78 ± 19.32 |
| 15  | 282.22 ± 21.24 | 277.22 ± 36.59 |
| 60  | 243.22 ± 21.14 | 283.11 ± 43.47 |
| 120 | 153.67 ± 10.03 | 184.00 ± 29.90 |

**(b)**

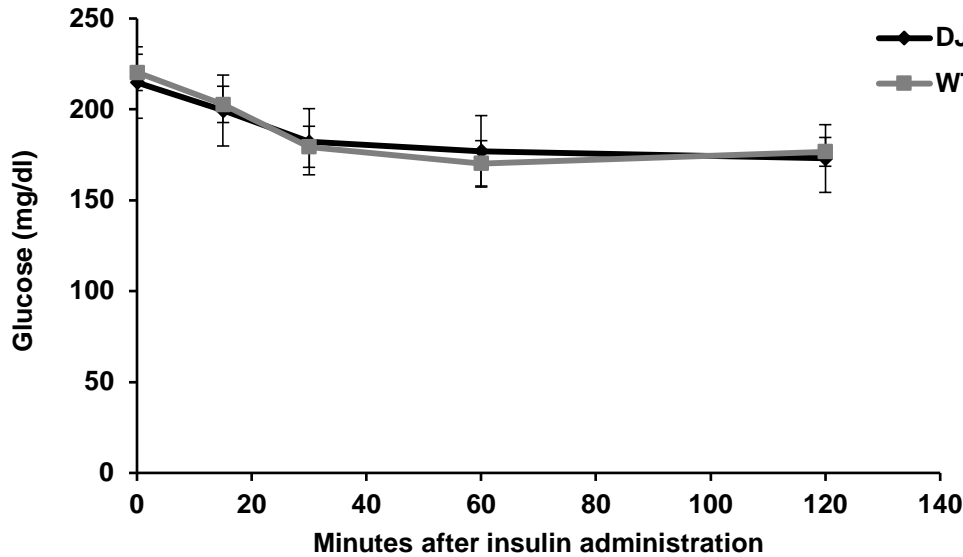

| min | WT             | DJ-1 KO        |
|-----|----------------|----------------|
| 0   | 220.25 ± 10.04 | 214.75 ± 19.73 |
| 15  | 202.63 ± 10.06 | 199.38 ± 19.51 |
| 30  | 179.25 ± 11.26 | 182.13 ± 18.15 |
| 60  | 170.25 ± 12.50 | 176.88 ± 19.62 |
| 120 | 176.63 ± 7.86  | 173.00 ± 18.58 |

**Supplementary Figure S5 (related to Figure 4). Glucose homeostasis and insulin sensitivity in WT and DJ-1 KO mice.**

(a) A glucose tolerance test (GTT) was performed in male HFD-fed WT and DJ-1 KO mice at 6 weeks.

(b) An insulin tolerance test (ITT) was performed at 6 weeks after HFD. n = 9 per group. All data are presented as the mean ± s.e.m.

**(a)**

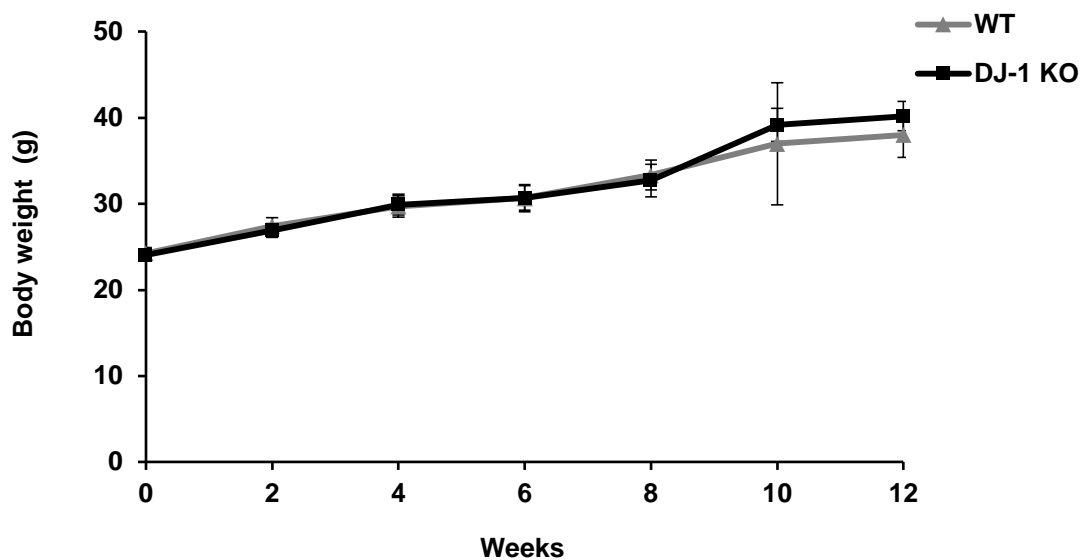

**(b)**

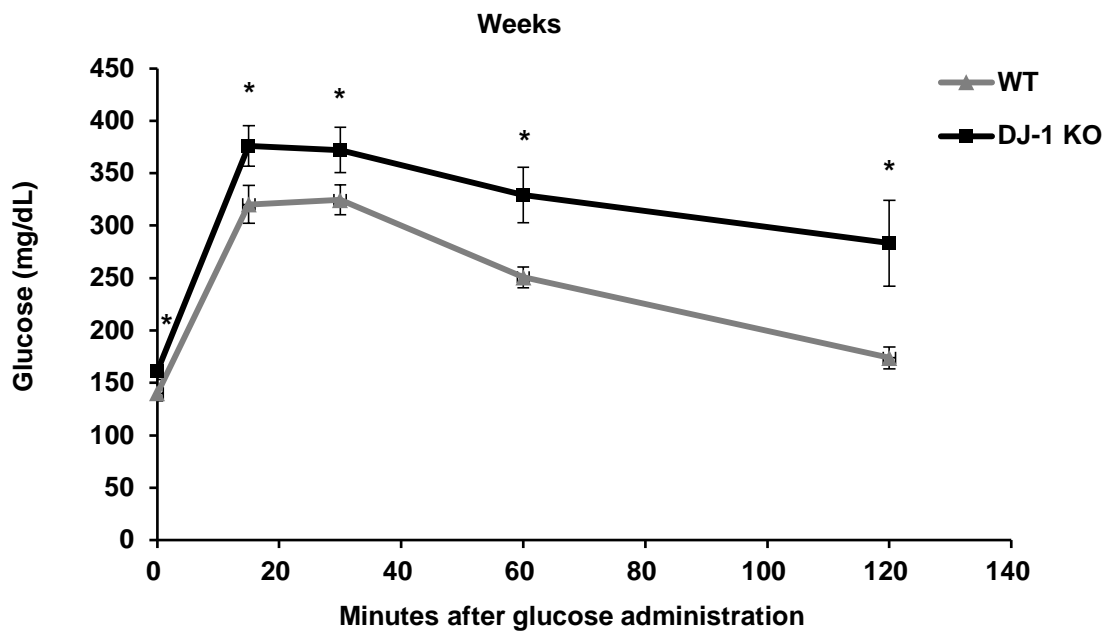

**(c)**

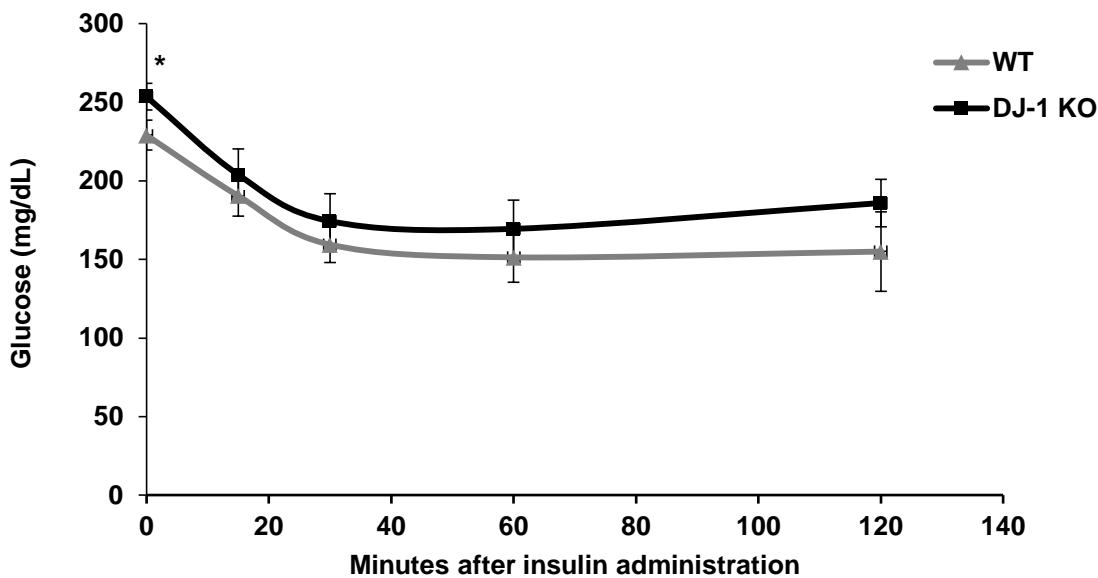

**Supplementary Figure S6 (related to Figure 4). DJ-1 KO mice show glucose intolerance in the HFD-induced obesity model.**

(a) The body weight changes of WT and DJ-1 KO mice fed an HFD. n = 9 per group. (b) A glucose tolerance test (GTT) was performed in male HFD-fed WT and HFD-fed DJ-1 KO mice at 12 weeks. \*, p < 0.05 versus the WT mice. n = 9 per group. (c) An insulin tolerance test (ITT) was performed at 12 weeks after HFD. \*, p < 0.05 versus the WT mice. n = 9 per group. All data are presented as the mean ± s.e.m.

| Weight |              |              |
|--------|--------------|--------------|
| Weeks  | WT           | DJ-1 KO      |
| 0      | 24.26 ± 0.64 | 24.04 ± 0.69 |
| 2      | 27.42 ± 0.95 | 26.91 ± 0.80 |
| 4      | 29.70 ± 1.23 | 29.91 ± 1.19 |
| 6      | 30.68 ± 1.58 | 30.69 ± 1.40 |
| 8      | 33.34 ± 1.74 | 32.70 ± 1.90 |
| 10     | 36.98 ± 7.08 | 39.17 ± 1.90 |
| 12     | 38.03 ± 2.60 | 40.19 ± 1.70 |

| GTT |                |                |
|-----|----------------|----------------|
| min | WT             | DJ-1 KO        |
| 0   | 140.02 ± 7.55  | 161.22 ± 7.90  |
| 15  | 320.22 ± 18.17 | 376.00 ± 19.44 |
| 30  | 324.67 ± 14.24 | 372.11 ± 21.58 |
| 60  | 250.78 ± 9.81  | 329.44 ± 26.46 |
| 120 | 173.89 ± 10.59 | 283.33 ± 40.87 |

| ITT |                |                |
|-----|----------------|----------------|
| min | WT             | DJ-1 KO        |
| 0   | 229.00 ± 9.44  | 253.56 ± 8.55  |
| 15  | 190.44 ± 12.94 | 203.89 ± 16.47 |
| 30  | 159.44 ± 11.51 | 174.33 ± 17.34 |
| 60  | 151.33 ± 15.85 | 169.44 ± 18.20 |
| 120 | 155.00 ± 25.20 | 185.89 ± 15.05 |



**(a)**

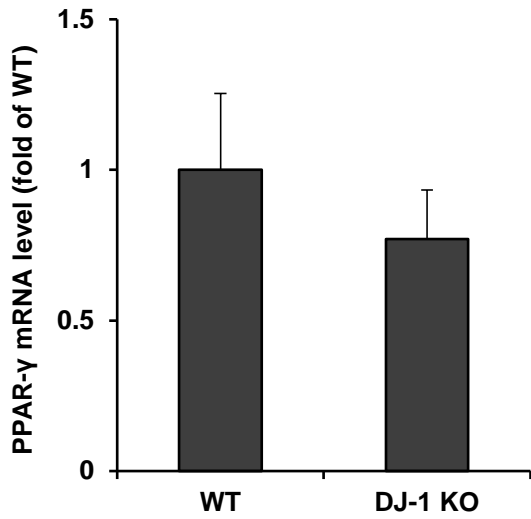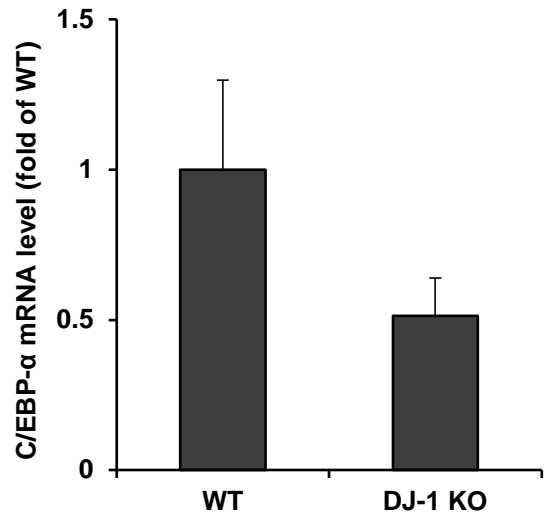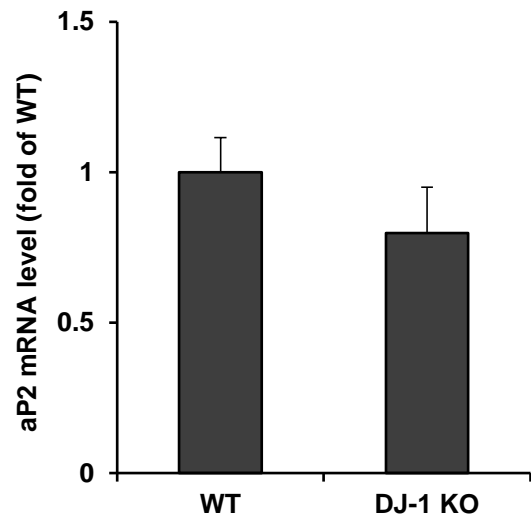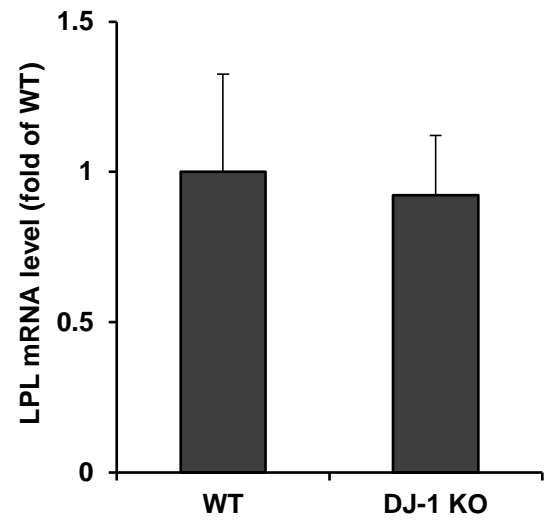

**(b)**

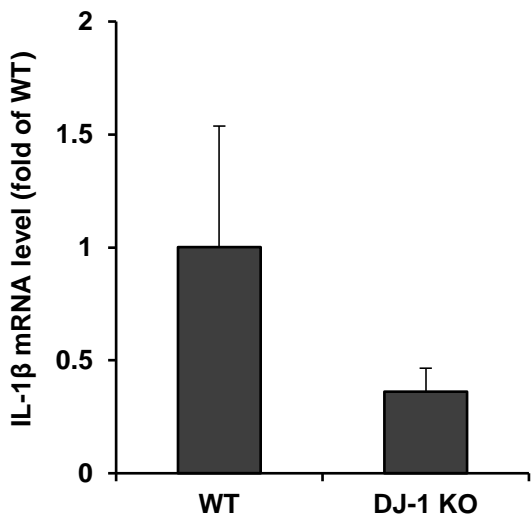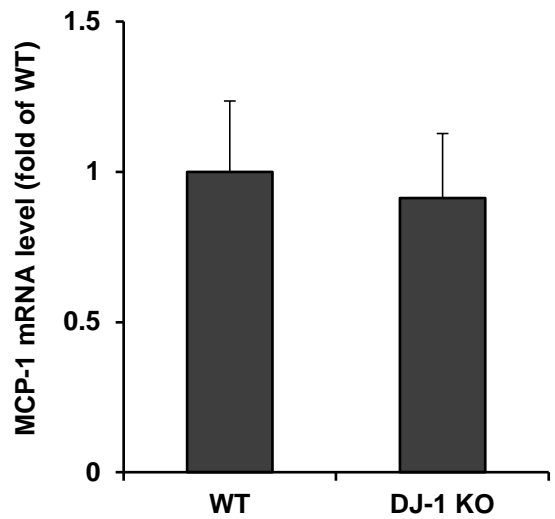

**Supplementary Figure S7 (related to Figure 4). The expression of adipogenic genes and pro-inflammatory cytokines in WAT.**

(a) The expression levels of adipogenic genes, such as PPAR- $\gamma$ , c/EBP- $\alpha$ , aP2 and LPL, were determined by RT-PCR in the white adipose tissue (WAT) from WT and DJ-1 KO mice fed an HFD for 12 weeks. (b) The mRNA levels of IL-1 $\beta$  and MCP-1 were determined in the WAT from HFD-fed WT and HFD-fed DJ-1 KO mice. All data are presented as the mean  $\pm$  s.e.m.

|                 | WT              | DJ-1 KO         |
|-----------------|-----------------|-----------------|
| PPAR- $\gamma$  | 1.00 $\pm$ 0.25 | 0.76 $\pm$ 0.16 |
| C/EBP- $\alpha$ | 1.00 $\pm$ 0.30 | 0.51 $\pm$ 0.13 |
| aP2             | 1.00 $\pm$ 0.12 | 0.80 $\pm$ 0.15 |
| LPL             | 1.00 $\pm$ 0.33 | 0.92 $\pm$ 0.2  |
| IL-1 $\beta$    | 1.00 $\pm$ 0.54 | 0.36 $\pm$ 0.10 |
| MCP-1           | 1.00 $\pm$ 0.24 | 0.91 $\pm$ 0.21 |

### Supplementary Table S1: RT-PCR Primer sequence

| Gene                                                                                     | Forward                        | Reverse                           |
|------------------------------------------------------------------------------------------|--------------------------------|-----------------------------------|
| DJ-1 ( <i>PARK7</i> )                                                                    | 5'-tatctgagtcgctggtgaa-3'      | 5'-ccttgcacccaaaacctacttc-3'      |
| peroxisome-proliferator-activated receptor- $\gamma$ ( <i>PPAR-<math>\gamma</math></i> ) | 5'-ggtgtgatcttaactgccg-3'      | 5'-cagatcagcagactctgggt-3'        |
| CCAAT/enhancer binding protein- $\alpha$ ( <i>C/EBP-<math>\alpha</math></i> )            | 5'-aacaacgcaagggcggcatgg-3'    | 5'-attcggtttgtgcgttcacctc-3'      |
| adipocyte protein 2 ( <i>aP2</i> )                                                       | 5'-aacaccgagatttcctcaaa-3'     | 5'-cacgccttcataacacattc-3'        |
| lipoprotein lipase ( <i>LPL</i> )                                                        | 5'-aacgtccacctcttaggtaca-3'    | 5'-gctggatccaaaccagtaattc-3'      |
| glucose transporter type 4 ( <i>GLUT4</i> )                                              | 5'-caatggtgggaagaaaagggcta-3'  | 5'-gtaggcgccaatgaggaaccgtc-3'     |
| Interleukin-1 $\beta$ ( <i>IL-1<math>\beta</math></i> )                                  | 5'-gggctgcttccaaacctttgac-3'   | 5'-atgggaacgtcacaccagca-3'        |
| interlukin-6 ( <i>IL-6</i> )                                                             | 5'-actcacaagtcggaggctt-3'      | 5'-ctgaaggactctggctttgtct-3'      |
| monocyte chemotactic protein-1 ( <i>MCP-1</i> )                                          | 5'-aactgcatctgcctaaggt-3'      | 5'- agtgcttgaggtggttggaaa-3'      |
| ribosomal protein large P0 ( <i>36B4</i> )                                               | 5'-tggccaataaggtgccagctgctg-3' | 5'-cttgtctccagtctttatcagctgcac-3' |

## **Supplementary Methods**

### **Glucose tolerance test (GTT) and insulin tolerance test (ITT)**

For glucose tolerance tests, HFD-fed male mice were fasted for 16 h before an i.p. injection of 10% d-glucose (10 mg/g body weight). Blood glucose was measured by tail vein bleeds at the indicated intervals using an ACCU-CHEK® Mobile system (Hoffmann-La Roche Ltd.). For insulin tolerance tests, HFD-fed male mice were fasted 4 h before an i.p. injection of insulin (0.75 U/kg body weight). All animal experiments were performed according to procedures approved by the Ulsan National Institute of Science and Technology's Institutional Animal Care and Use Committee.
